# Supplementary material
Source: Research Square preprint supplement (doi:10.21203/rs.3.rs-9258115/v1)
Supplement: Supplementary file 1 [file 734e08f9c1afac704e2e5dfd.xlsx]

## Sheet: Sheet1
Supplementary Tabel 1. Patient demographic and clinical information
Each row represent a patient. The information include ID number of patient, Patient demographic information (Age, Gender), Actionable genetic alterations(AGA), EGFR Status, Date of enrolment. Given Treatment, Line of treatment, Treatment Start, Treatment Stop, CT date, Result of CT (CT), Disease progress date (PD date), Progressive-free Survival (PFS)
Patient ID	Age(dathofentry)	Gender	AGA	EGFR.Status	Enrolment_date (MM/DD/YY)	Treatment	Line of treatment	Treatment Start	Treatment Stop	CT date	CT	PD date	PFS	Status	Reason
2LB-001	61	Male	EGFR19del+T790M	EGFR+	2024-05-14	Osimertinib	2	2024-06-10	2025-02-10	2024-09-17	SD	2024-12-20	193
2LB-002	61	Male	NO	EGFR-	2023-05-19	Cb/Pac	1	2023-05-16	2023-06-06	2023-07-04	PD	2023-07-04	49
2LB-003	62	Female	BRAFV600E	EGFR-	2023-05-30	Cb/Pem	1	2023-06-20	2023-09-19	2023-09-03	PR	2023-11-06	139
2LB-006	69	Male	NO	EGFR-	2023-06-16	Cb/Pac	1	2023-06-30	2023-08-10	2023-08-21	PD	2023-08-21	52
2LB-007	69	Female	EGFRL858R+EXON20ins	EGFR+	2023-06-27	Erlotinib	1	2023-07-10		2023-09-21	PR		739	Censored	Still Rx
2LB-008	61	Female	Exon 19 del (plasma)	EGFR+	2023-06-27	Erlotinib	1	2023-06-27	2023-12-26	2023-09-19	PR	2023-12-17	173
2LB-009	59	Male	EGFRL858R	EGFR+	2023-06-28	Erlotinib	1	2023-06-27	2024-03-12	2023-09-14	PR	2024-03-26	273
2LB-010	32	Male	ROS1fusion	EGFR-	2023-04-07	Cb/Pac+ Pemb	1	2023-07-03	2023-11-08	2023-09-14	SD	2023-11-21	141
2LB-011	54	Female	L858R(plasma)	EGFR+	2023-07-19	Erlotinib	1	2023-07-19	2024-11-20	2023-10-18	PR	2024-10-31	470
2LB-012	75	Female	EGFR19del	EGFR+	2023-09-06	Erlotinib	1	2023-09-06	2024-10-15	2023-11-22	PR	2024-10-06	396
2LB-013	66	Female	ALK fusion	EGFR-	2023-09-12	Ceritinib	1	2023-09-20		2023-11-04	PR		667	Censored	Still Rx
2LB-014	69	Female	EGFRL858R	EGFR+	2023-09-21	Erlotinib	1	2023-09-20	Loss FU	2023-12-25	PR		96	Censored	Lost FU
2LB-015	58	Female	EGFRL858R (mixed with NPCA)	EGFR+	2023-10-03	Erlotinib	1	2023-11-28	2024-08-07	2024-01-22	PD	2025-01-09	408
2LB-016	58	Female	NO	EGFR-	2023-10-18	Cb/Pem	1	2024-01-08	2024-06-13	2024-04-25	PR	2024-07-19	193
2LB-018	57	Female	Exon 19 del	EGFR+	2023-11-01	Erlotinib	1	2023-11-01	2025-02-10	2024-02-01	PR	2024-02-04	95
2LB-019	70	Male	NO	EGFR-	2023-11-15	Cb/Pem	1	2023-11-22	2024-01-24	2024-02-10	PD	2024-02-10	80
2LB-020	65	Female	KRASK12D	EGFR-	2023-12-06	Cb/Pac	1	2023-11-21	2024-01-24	2024-02-14	PD	2024-02-14	85
2LB-021	51	Male	NO	EGFR-	2023-12-13	Cb/Pac	1	2023-12-26	2024-04-22	2024-02-21	PR	2024-07-30	217
2LB-022	61	Male	Exon19 del(plasma)	EGFR+	2023-12-15	Erlotinib	1	2023-12-27		2024-02-13	PR		569	Censored	Still Rx
2LB-023	78	Female	EGFRL858R	EGFR+	2023-12-20	Erlotinib	1	2023-12-18	2024-09-09	2024-02-23	PR	2024-08-28	254
2LB-024	59	male	Exon20ins	EGFR-	2024-01-29	Cb/Pac	1	2024-07-09	2024-11-02	2024-09-27	SD	2025-04-22	287
2LB-025	62	Female	KRASG12D	EGFR-	2024-02-05	Cb/Pac	1	2024-02-02	2024-06-01	2024-03-30	SD	2024-08-24	204
2LB-026	73	Female	HER2	EGFR-	2024-02-20	Cb/Pac	1	2024-03-25	2024-08-06	2024-09-05	SD	2025-01-24	305
2LB-027	75	Male	EGFRL858R	EGFR+	2024-03-11	Erlotinib	1	2024-03-09	2025-03-22	2024-06-28	SD	2025-03-03	359
2LB-028	60	Male	NO	EGFR-	2024-12-03	Cb/Pac	1	2024-03-27	2024-05-29	2024-05-31	PD	2024-05-31	65
2LB-030	75	male	Exon20ins	EGFR-	2024-06-07	Cb/Gem	1	2024-07-09	2024-10-22	2024-09-22	PR	2025-01-09	184
2LB-031	55	male	NO	EGFR-	2024-06-11	Cb/Pem	1	2024-06-08	2024-09-28	2024-08-18	SD		71	Censored	Lost FU
2LB-033	66	Female	Exon19del	EGFR+	2024-07-20	Erlotinib	1	2024-08-06	2025-04-08	2024-09-28	PR	2025-03-30	236
2LB-034	66	male	NO	EGFR-	2024-08-28	Cb/Gem	1	2024-08-26	2024-12-25	2024-11-25	SD	2025-03-04	190
2LB-035	69	Female	Exon19del	EGFR+	2024-09-10	Erlotinib	1	2024-09-10		2024-12-13	SD		311	Censored	Still Rx
2LB-036	77	Female	EGFRL858R	EGFR+	2024-09-16	Erlotinib	1	2024-09-30	2025-05-15	2025-01-28	PR	2025-05-15	227
2LB-037	65	male	Exon19del	EGFR+	2024-10-07	Exon19del	1	2024-10-17		2024-12-15	PR		274	Censored	Still Rx
2LB-038	56	Male	Exon19del	EGFR+	2024-11-23	Exon19del	1	2024-11-23		2025-02-15	PR		237	Censored	Still Rx
