# Supplementary material
Source: Research Square preprint supplement (doi:10.21203/rs.3.rs-9258115/v1)
Supplement: Supplementary file 2 [file cfef9730863d5254adfcda46.xlsx]

## Sheet: Sheet1
Supplementary Table 2 : cfDNA overall analysis data
Each row represent a cfDNA from 33 NSCLC patients and 10 additional healthy controls. The information include cfDNA concentration (ng /µl), ctDNA fraction and ploidy reported from ichorCNA, ctDNA.status whether the ctDNA fraction is higher than 3% (or 0.03 in column ctDNA fraction; ctDNA+) or not (ctDNA-), Clinical time point, Sampeling Data, CES and SL Ratio
Patient ID	Sample.Name	Concentration (ng /µl)	ctDNA fraction	Ploidy	Participant.Group	ctDNA.status (TF > 3%)	Time.point	Sampling Date	CES	SL Ratio
0LB-001	0LB-001P-01	2.16	0.0046	NA	Healthy	Healthy	Healthy		19.429	0.1
0LB-002	0LB-002P-01	1.256	0.0111	NA	Healthy	Healthy	Healthy		14.666	0.12
0LB-003	0LB-003P-01	1.348	0.0078	NA	Healthy	Healthy	Healthy		16.413	0.16
0LB-004	0LB-004P-01	1.536	0.0087	NA	Healthy	Healthy	Healthy		20.522	0.1
0LB-005	0LB-005P-01	7.28	0.0026	NA	Healthy	Healthy	Healthy		21.707	0.1
0LB-006	0LB-006P-01	1.45	0.0029	NA	Healthy	Healthy	Healthy		18.97	0.12
0LB-007	0LB-007P-01	1.19	0.0026	NA	Healthy	Healthy	Healthy		17.647	0.11
0LB-008	0LB-008P-01	2.16	0.0047	NA	Healthy	Healthy	Healthy		18.731	0.11
0LB-009	0LB-009P-01	1.42	0.0063	NA	Healthy	Healthy	Healthy		21.028	0.16
0LB-010	0LB-010P-01	2.04	0.0061	NA	Healthy	Healthy	Healthy		20.492	0.13
2LB-001	2LB-001P-01	6.8	0.0441	1.892	Patient	ctDNA+	diagnosis	2023-04-24	32.48	0.15
2LB-001	2LB-001P-02	6.96	0.0201	1.965	Patient	ctDNA-	week 4	2023-05-22	22.21	0.13
2LB-001	2LB-001P-03	1.34	0.0053	2.016	Patient	ctDNA-	week 12	2023-07-17	21.068	0.11
2LB-002	2LB-002P-01	15.7	0.0926	2.272	Patient	ctDNA+	diagnosis	2023-05-16	63.433	0.19
2LB-002	2LB-002P-02	8.04	0.0775	2.277	Patient	ctDNA+	week 4	2023-06-02	49.249	0.17
2LB-002	2LB-002P-03	12.5	0.1488	2.276	Patient	ctDNA+	week 12	2023-06-27	90.091	0.19
2LB-003	2LB-003P-01	4.9	0.0058	1.885	Patient	ctDNA-	diagnosis	2023-05-30	18.861	0.11
2LB-003	2LB-003P-02	0.784	0.0077	2.107	Patient	ctDNA-	week 4	2023-07-11	21.22	0.12
2LB-003	2LB-003P-03	2.34	0.0069	2.016	Patient	ctDNA-	week 12	2023-08-29	19.109	0.06
2LB-006	2LB-006P-01	7.88	0.0073	1.879	Patient	ctDNA-	diagnosis	2023-06-16	22.104	0.15
2LB-006	2LB-006P-02	1.47	0.0277	1.813	Patient	ctDNA-	week 4	2023-07-20	22.602	0.08
2LB-006	2LB-006P-03	3.46	0.0473	1.965	Patient	ctDNA+	week 12	2023-09-21	22.966	0.08
2LB-007	2LB-007P-01	5.62	0.0081	1.989	Patient	ctDNA-	diagnosis	2023-06-26	26.069	0.13
2LB-007	2LB-007P-02	1.2	0.0053	1.918	Patient	ctDNA-	week 4	2023-08-15	21.002	0.07
2LB-007	2LB-007P-03	1.31	0.0097	2.023	Patient	ctDNA-	week 12	2023-10-09	24.685	0.08
2LB-008	2LB-008P-01	12.4	0.012	1.928	Patient	ctDNA-	diagnosis	2023-06-27	27.161	0.14
2LB-008	2LB-008P-02	1.02	0.0126	2.118	Patient	ctDNA-	week 4	2023-07-25	21.401	0.08
2LB-008	2LB-008P-03	1.83	0.006	2.023	Patient	ctDNA-	week 12	2023-09-26	26.514	0.08
2LB-009	2LB-009P-01	89.2	0.014	2.004	Patient	ctDNA-	diagnosis	2023-06-27	19.579	0.24
2LB-009	2LB-009P-02	8.62	0.0111	2.1	Patient	ctDNA-	week 4	2023-07-25	20.888	0.16
2LB-009	2LB-009P-03	1.37	0.0112	1.89	Patient	ctDNA-	week 12	2023-09-26	19.792	0.1
2LB-010	2LB-010P-01	6.2	0.0514	1.903	Patient	ctDNA+	diagnosis	2023-03-07	63.096	0.12
2LB-010	2LB-010P-02	2.44	0.0097	1.859	Patient	ctDNA-	week 4	2023-07-24	18.661	0.06
2LB-010	2LB-010P-03	0.762	0.0037	1.588	Patient	ctDNA-	week 12	2023-09-27	22.702	0.09
2LB-011	2LB-011P-01	2.7	0.12	2.574	Patient	ctDNA+	diagnosis	2023-07-19	39.978	0.11
2LB-011	2LB-011P-02	1.29	0.0302	1.894	Patient	ctDNA+	week 4	2023-08-09	22.957	0.09
2LB-011	2LB-011P-03	2.04	0.0418	2.04	Patient	ctDNA+	week 12	2023-10-25	16.091	0.07
2LB-012	2LB-012P-01	3.14	0.0412	2.078	Patient	ctDNA+	diagnosis	2023-06-09	47.299	0.12
2LB-012	2LB-012P-02	2.38	0.0095	1.993	Patient	ctDNA-	week 4	2023-10-04	19.767	0.08
2LB-012	2LB-012P-03	2.38	0.0107	1.836	Patient	ctDNA-	week 12	2023-11-29	26.045	0.07
2LB-013	2LB-013P-01	2.88	0.0095	2.108	Patient	ctDNA-	diagnosis	2023-12-09	25.72	0.08
2LB-013	2LB-013P-02	2	0.012	2.012	Patient	ctDNA-	week 4	2023-11-13	29.295	0.11
2LB-013	2LB-013P-03	0.802	0.0135	1.792	Patient	ctDNA-	week 12	2024-01-11	22.058	0.1
2LB-014	2LB-014P-01	2.42	0.0935	2.116	Patient	ctDNA+	diagnosis	2023-09-20	79.52	0.11
2LB-014	2LB-014P-02	1.96	0.0107	2.08	Patient	ctDNA-	week 4	2023-10-18	23.646	0.08
2LB-014	2LB-014P-03	1.46	0.0129	1.869	Patient	ctDNA-	week 12	2023-12-27	21.389	0.09
2LB-015	2LB-015P-01	1.93	0.005	2.098	Patient	ctDNA-	diagnosis	2023-03-10	22.978	0.07
2LB-015	2LB-015P-02	2.84	0.0498	2.49	Patient	ctDNA+	week 4	2023-10-31	47.281	0.07
2LB-015	2LB-015P-03	2.58	0.368	2.546	Patient	ctDNA+	week 12	2023-12-26	52.354	0.08
2LB-016	2LB-016P-01	5.93	0.0124	2.029	Patient	ctDNA-	diagnosis	2023-10-18	29.149	0.11
2LB-016	2LB-016P-02	11.4	0.0188	2.226	Patient	ctDNA-	week 4	2023-11-16	29.394	0.19
2LB-016	2LB-016P-03	3.62	0.1211	2.097	Patient	ctDNA+	week 12	2024-01-08	67.803	0.16
2LB-018	2LB-018P-01	2.94	0.0117	2.195	Patient	ctDNA-	diagnosis	2023-01-11	16.058	0.09
2LB-018	2LB-018P-02	1.46	0.0112	2.121	Patient	ctDNA-	week 4	2023-12-18	24.832	0.09
2LB-018	2LB-018P-03	1.33	0.0122	2.049	Patient	ctDNA-	week 12	2024-01-15	24.898	0.09
2LB-019	2LB-019P-01	3.24	0.3123	2.315	Patient	ctDNA+	diagnosis	2023-11-15	91.282	0.17
2LB-019	2LB-019P-02	3.16	0.3091	2.227	Patient	ctDNA+	week 4	2024-01-03	110.103	0.19
2LB-019	2LB-019P-03	16.2	0.3343	2.36	Patient	ctDNA+	week 12	2024-04-26	101.559	0.17
2LB-020	2LB-020P-01	1.96	0.0131	2.127	Patient	ctDNA-	diagnosis	2023-06-12	22.983	0.08
2LB-020	2LB-020P-02	2.86	0.0183	2.076	Patient	ctDNA-	week 4	2024-01-02	24.17	0.11
2LB-020	2LB-020P-03	4.38	0.0148	2.26	Patient	ctDNA-	week 12	2024-03-06	36.48	0.09
2LB-021	2LB-021P-01	4.08	0.0756	2.043	Patient	ctDNA+	diagnosis	2023-12-13	63.455	0.14
2LB-021	2LB-021P-02	1.54	0.0098	1.949	Patient	ctDNA-	week 4	2024-01-15	26.244	0.09
2LB-021	2LB-021P-03	1.06	0.0033	2.099	Patient	ctDNA-	week 12	2024-03-25	22.598	0.07
2LB-022	2LB-022P-01	1.36	0.012	2.023	Patient	ctDNA-	diagnosis	2023-12-15	21.471	0.1
2LB-022	2LB-022P-02	0.484	0.0214	2.081	Patient	ctDNA-	week 4	2024-01-18	15.734	0.12
2LB-022	2LB-022P-03	0.356	0.0207	2.139	Patient	ctDNA-	week 12	2024-05-15	15.15	0.1
2LB-023	2LB-023P-01	4.92	0.4402	2.636	Patient	ctDNA+	diagnosis	2023-12-18	85.816	0.17
2LB-023	2LB-023P-02	2.3	0.0086	2.055	Patient	ctDNA-	week 4	2024-02-07	19.596	0.11
2LB-023	2LB-023P-03	0.96	0.0084	1.744	Patient	ctDNA-	week 12	2024-03-04	25.05	0.11
2LB-024	2LB-024P-01	1.32	0.0054	1.609	Patient	ctDNA-	diagnosis	2024-01-29	19.366	0.09
2LB-024	2LB-024P-02	1.65	0.0099	1.961	Patient	ctDNA-	week 4	2024-08-24	20.236	0.11
2LB-024	2LB-024P-03	0.72	0.0075	2.002	Patient	ctDNA-	week 12	2024-10-12	22.486	0.13
2LB-025	2LB-025P-01	0.814	0.007	1.985	Patient	ctDNA-	diagnosis	2024-03-02	26.166	0.12
2LB-025	2LB-025P-02	1.74	0.0102	1.964	Patient	ctDNA-	week 4	2024-03-02	23.314	0.1
2LB-025	2LB-025P-03	0.412	0.0052	1.787	Patient	ctDNA-	week 12	2024-05-14	22.446	0.11
2LB-026	2LB-026P-01	0.996	0.0096	1.975	Patient	ctDNA-	diagnosis	2024-02-20	27.597	0.09
2LB-026	2LB-026P-02	1.07	0.0068	1.987	Patient	ctDNA-	week 4	2567-05-21	25.281	0.11
2LB-026	2LB-026P-03	0.642	0.0039	1.846	Patient	ctDNA-	week 12	2024-05-21	24.127	0.09
2LB-027	2LB-027P-01	1.42	0.0275	1.94	Patient	ctDNA-	diagnosis	2024-09-03	19.603	0.09
2LB-027	2LB-027P-02	2.14	0.0054	1.987	Patient	ctDNA-	week 4	2024-03-30	16.909	0.08
2LB-027	2LB-027P-03	1.64	0.0055	1.888	Patient	ctDNA-	week 12	2024-06-04	22.457	0.12
2LB-028	2LB-028P-01	3.6	0.0575	2.006	Patient	ctDNA+	diagnosis	2024-12-03	58.319	0.13
2LB-028	2LB-028P-02	3.44	0.05	1.909	Patient	ctDNA+	week 4	2024-04-18	48.096	0.09
2LB-028	2LB-028P-03	0.648	0.0323	1.962	Patient	ctDNA+	week 12	2024-05-29	60.159	0.08
2LB-030	2LB-030P-01	0.974	0.011	1.894	Patient	ctDNA-	diagnosis	2024-07-06	18.765	0.09
2LB-030	2LB-030P-02	1.17	0.0136	2.051	Patient	ctDNA-	week 4	2024-08-20	17.694	0.13
2LB-030	2LB-030P-03	1.61	0.0133	2.038	Patient	ctDNA-	week 12	2024-10-22	20.931	0.13
2LB-031	2LB-031P-01	1.55	0.0135	2.052	Patient	ctDNA-	diagnosis	2024-08-06	32.568	0.08
2LB-031	2LB-031P-02	1.21	0.015	2.032	Patient	ctDNA-	week 4	2024-07-08	28.428	0.1
2LB-031	2LB-031P-03	1.19	0.0138	1.977	Patient	ctDNA-	week 12	2024-09-08	33.732	0.13
2LB-033	2LB-033P-01	10.7	0.0586	1.974	Patient	ctDNA+	diagnosis	2024-07-20	29.954	0.12
2LB-033	2LB-033P-02	2.04	0.0017	1.858	Patient	ctDNA-	week 4	2024-08-20	24.065	0.12
2LB-033	2LB-033P-03	0.82	0.0082	1.954	Patient	ctDNA-	week 12	2024-11-05	20.481	0.13
2LB-034	2LB-034P-01	6.4	0.343	2.246	Patient	ctDNA+	diagnosis	2024-08-28	101.261	0.44
2LB-034	2LB-034P-02	9.84	0.2124	2.217	Patient	ctDNA+	week 4	2024-09-25	111.38	0.3
2LB-034	2LB-034P-03	0.5	0.0426	1.959	Patient	ctDNA+	week 12	2024-12-04	23.959	0.13
2LB-035	2LB-035P-01	0.78	0.0116	2.148	Patient	ctDNA-	diagnosis	2024-10-09	20.962	0.11
2LB-035	2LB-035P-02	1.24	0.0168	2.106	Patient	ctDNA-	week 4	2024-11-26	16.953	0.12
2LB-035	2LB-035P-03	1.08	0.0146	2.067	Patient	ctDNA-	week 12	2024-12-24	20.742	0.1
2LB-036	2LB-036P-01	1.02	0.1254	1.961	Patient	ctDNA+	diagnosis	2024-09-16	70.651	0.15
2LB-036	2LB-036P-02	0.71	0.0324	1.844	Patient	ctDNA+	week 4	2024-10-11	20.774	0.12
2LB-036	2LB-036P-03	0.98	0.0506	1.983	Patient	ctDNA+	week 12	2025-02-14	27.168	0.11
2LB-037	2LB-037P-01	0.67	0.0302	1.991	Patient	ctDNA+	diagnosis	2024-07-10	25.116	0.11
2LB-037	2LB-037P-02	0.9	0.0082	1.547	Patient	ctDNA-	week 4	2025-01-31	20.717	0.1
2LB-037	2LB-037P-03	1.24	0.0195	2.163	Patient	ctDNA-	week 12	2025-03-20	26.536	0.1
2LB-038	2LB-038P-01	1.4	0.0091	1.921	Patient	ctDNA-	diagnosis	2024-11-23	23.85	0.11
2LB-038	2LB-038P-02	0.87	0.0151	1.883	Patient	ctDNA-	week 4	2025-02-22	22.728	0.1
2LB-038	2LB-038P-03	1.1	0.0157	1.755	Patient	ctDNA-	week 12	2025-02-22	16.581	0.11
